# Supplementary material
Source: publisher figshare collection journal article supplement (https://sage.figshare.com/ndownloader/files/24154558)
Supplement: Supplementary file 1 [file 24154558]

Appendix 1.

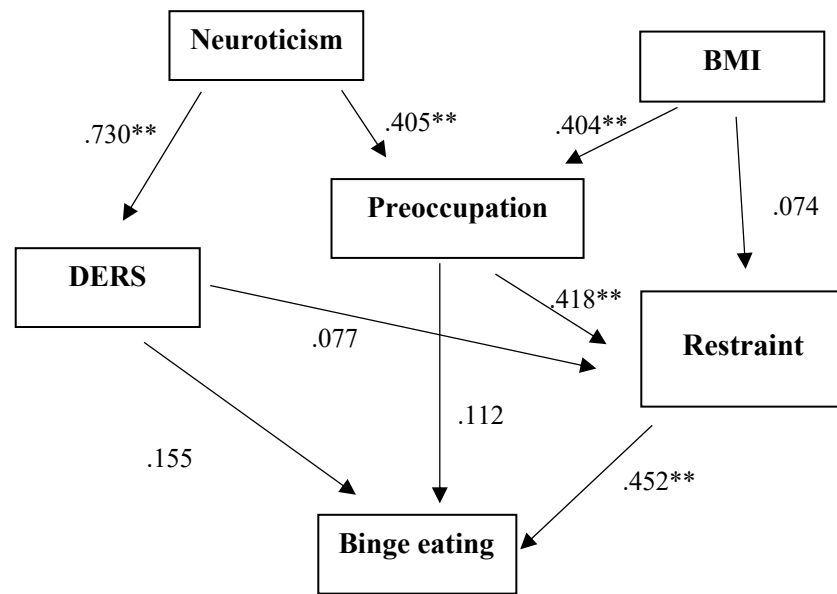

Figure 1. Model 1

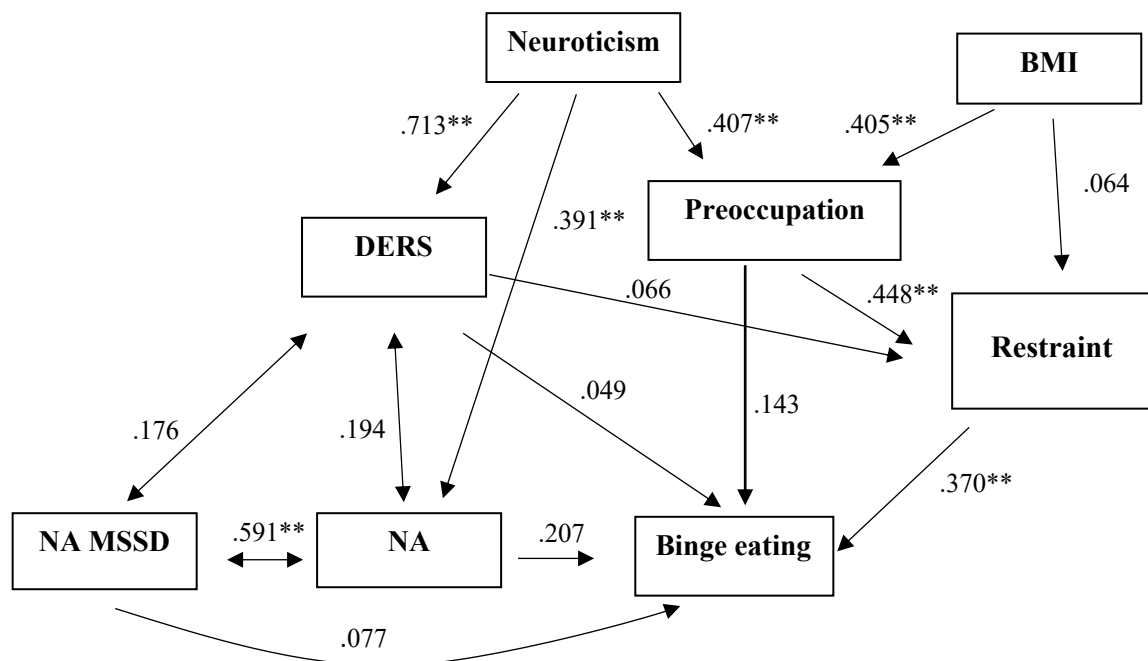

Figure 2. Model 2

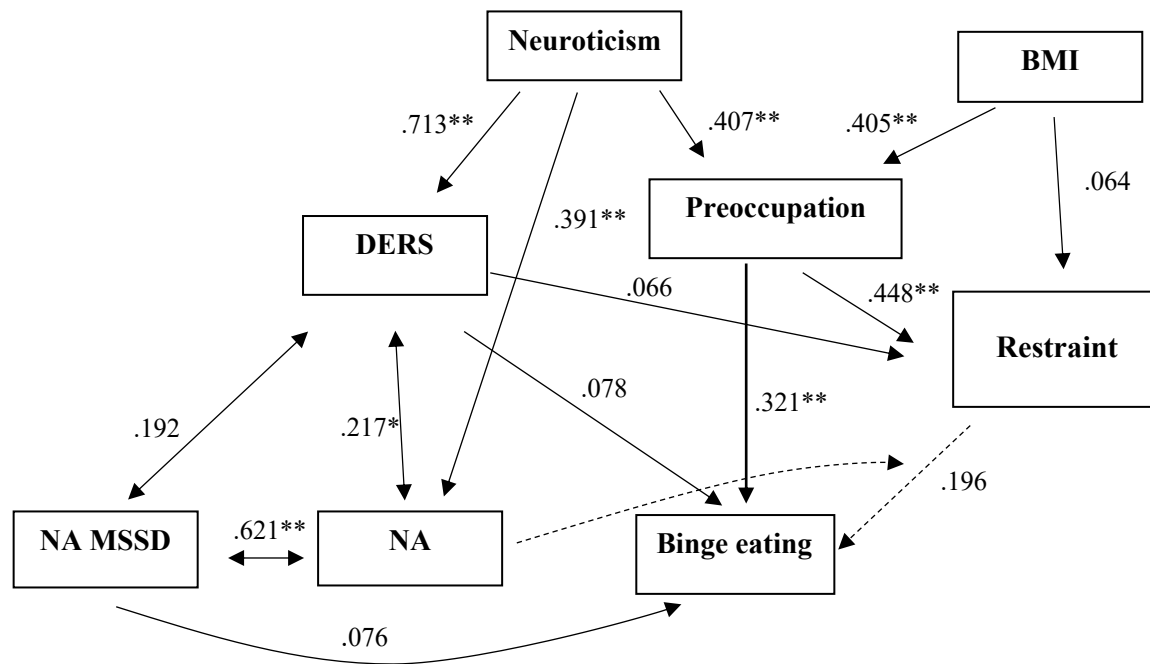

Figure 3. Model 3

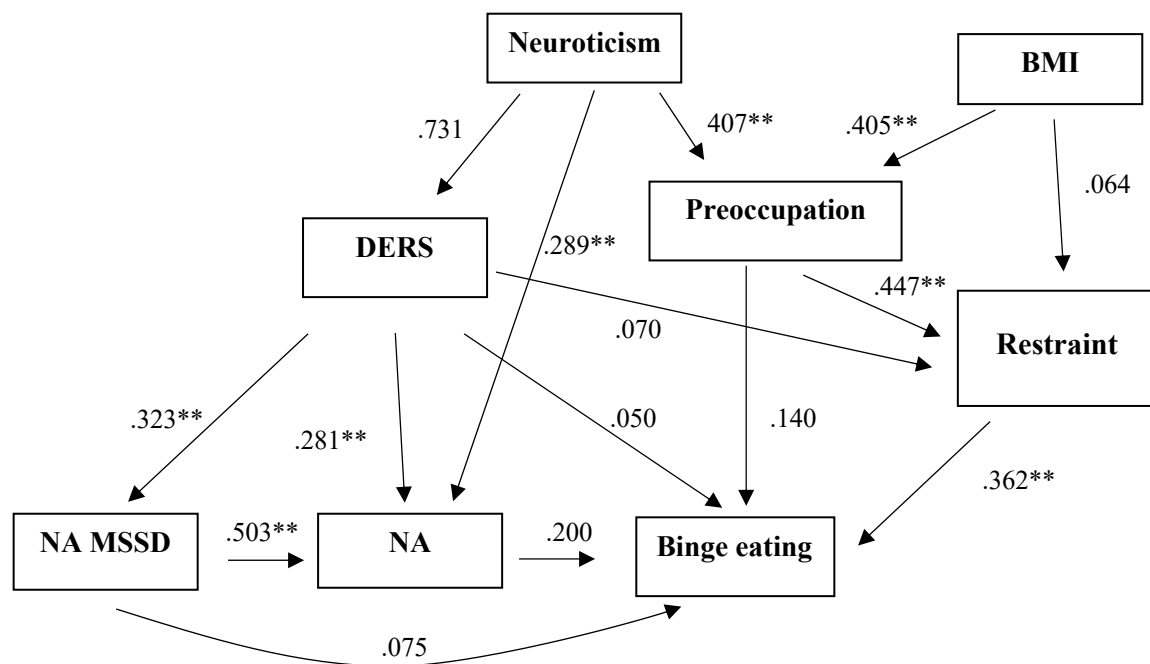

Figure 4. Model 4

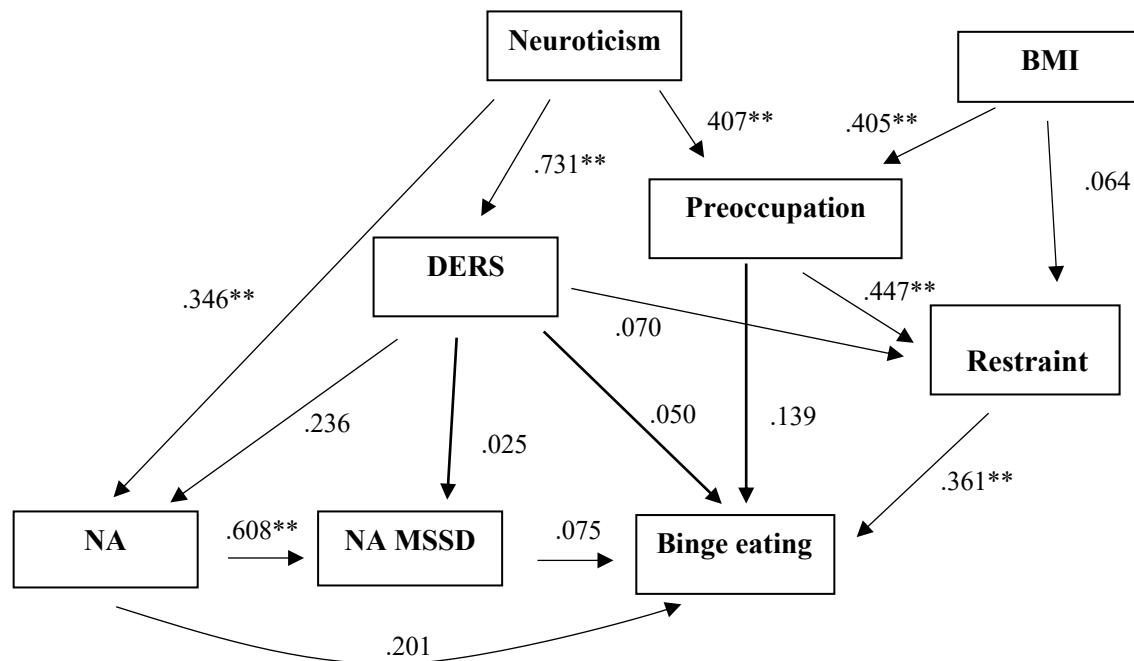

Figure 5. Model 5

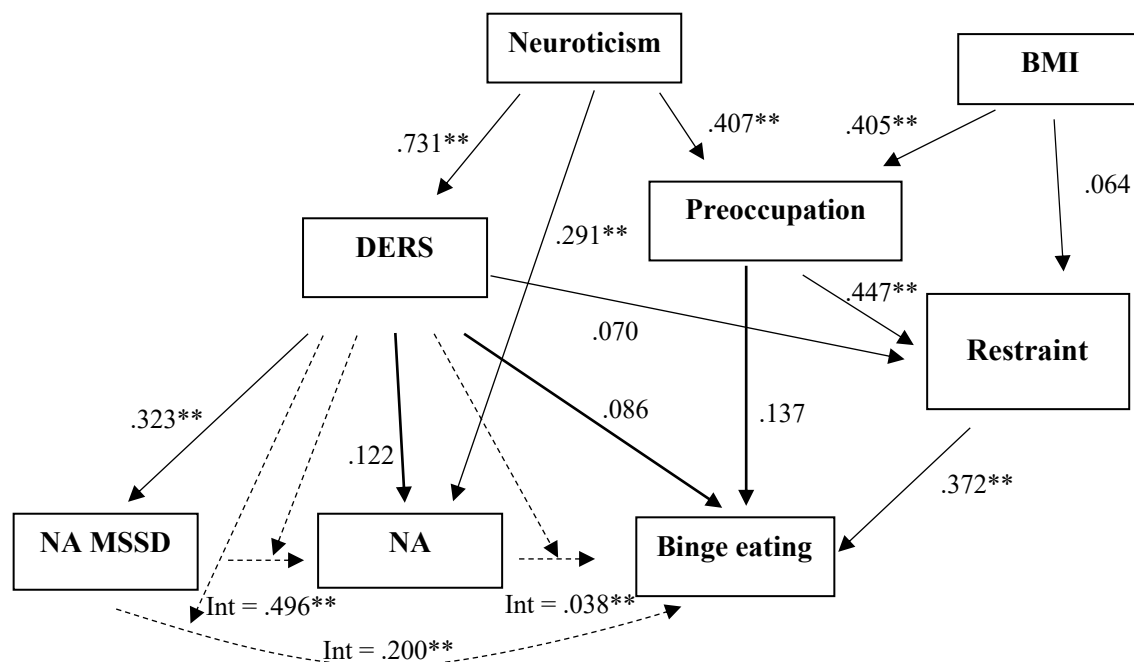

Figure 6. Model 6

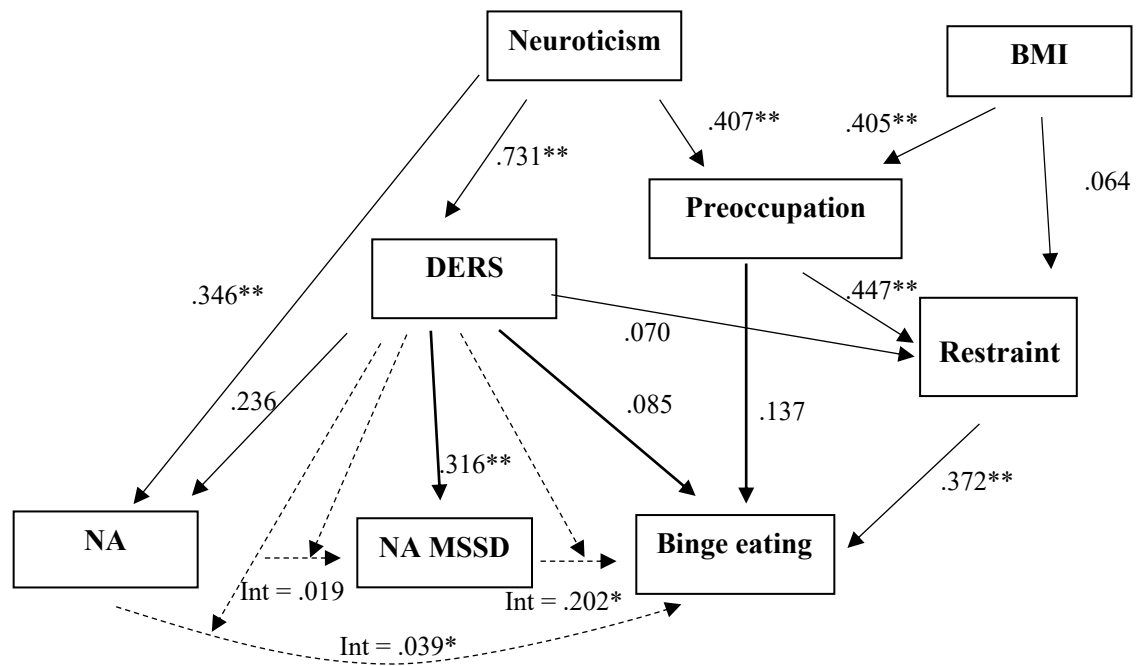

Figure 7. Model 7

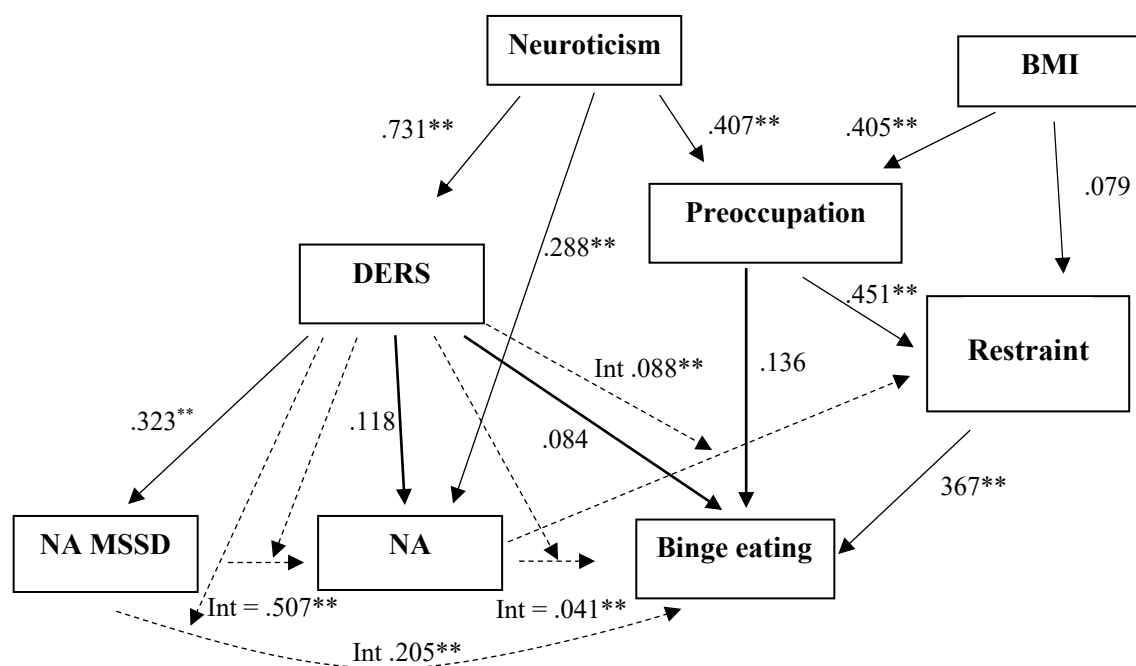

Figure 8. Model 8
